# Supplementary material for: Evaluation of a Restoration Algorithm Applied to Clipped Tibial Acceleration Signals
Source: MDPI journal article supplement (doi:10.3390/s23104609), 2023-05-10

# Supplementary File S1

## Data processing flow diagram

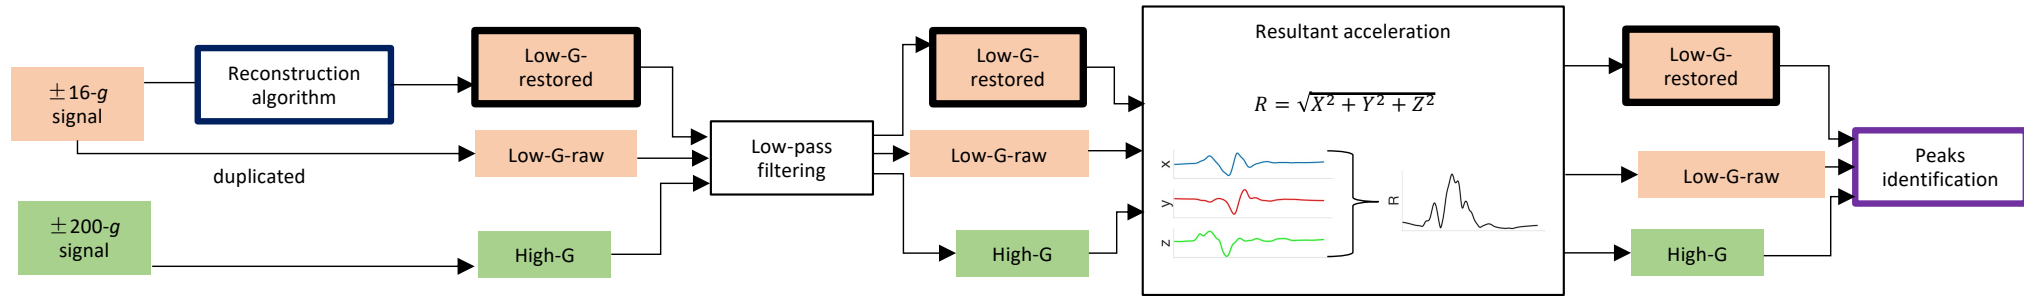

### Reconstruction algorithm

- At each axis (x, y and z),
1. The clipped portion is identified from raw signal (solid line),
  2. Three data points before and after the clipped portion (as indicated by black dots) were used for interpolation, and
  3. Signal at the clipped portion was reconstructed (dotted line) by 5<sup>th</sup> order spline interpolation

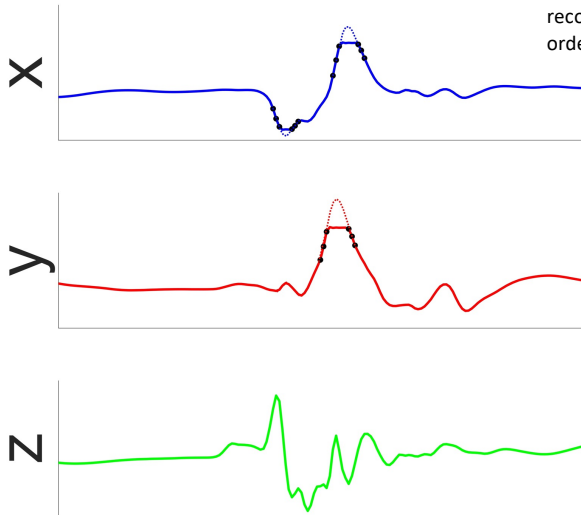

### Peaks identification

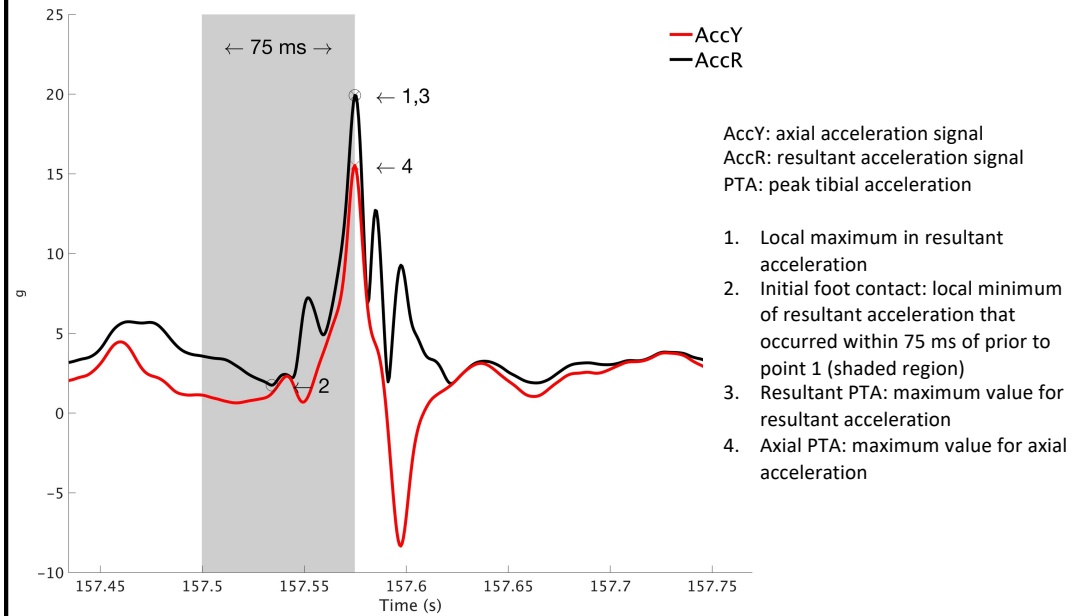

## Supplementary File S2

MATLAB script used for restoration.

Sample data and a copy of the MATLAB script can be downloaded at FigShare:

<https://doi.org/10.6084/m9.figshare.22720327>

```
axis_n={'x','y','z'};

load('sample.mat')

tempLowG = sample.lowG_raw;
tempHighG = sample.highG_raw;

for axisn=1:3      %convert ms^-2 > g
    tempLowG.(['a' axis_n{axisn} '_g']) = tempLowG.(['a' axis_n{axisn}
'_mss'])/9.81;
    tempHighG.(['a' axis_n{axisn} '_g']) = tempHighG.(['a' axis_n{axisn}
'_mss'])/9.81;
end
sample.lowG_raw = tempLowG;
sample.highG_raw = tempHighG;

clipThreshold = 15.985; % value of flat cut-offs, to identify clipped regions

for axisn=1:3
    recon=[];
    clear temp2 temp3 tooHighTemp tooLowTemp outOfBounds inBound

    tooHighTemp=find(tempLowG.(['a' axis_n{axisn} '_g'])<=-clipThreshold); %
identify upper (~16-g) flat cut-offs
    tooLowTemp=find(tempLowG.(['a' axis_n{axisn} '_g'])>=clipThreshold); %
identify lower (~ 16-g) flat cut-offs

    outOfBounds=sort([tooHighTemp; tooLowTemp]);
    inBound=find(~ismember(1:size(tempLowG,1),outOfBounds));

    %Uncomment below to plot points identified as clipped sections (red
    %crosses)
    %       plot(tempLowG.time_s,tempLowG.ay_g)
    %       hold on
    %
    plot(tempLowG.time_s(outOfBounds),tempLowG.ay_g(outOfBounds),'rx')

    temp2=[tempLowG.time_s(inBound) tempLowG.(['a' axis_n{axisn}
'_g'])(inBound) inBound]; % signal to be preserved
    temp3=[tempLowG.time_s(outOfBounds) tempLowG.(['a' axis_n{axisn}
'_g'])(outOfBounds) outOfBounds]; % clipped portion

    temp4=[]; temp5=[]; upE=[]; downE=[];
    winSize=3; % number of points to use before and after the identified
clipped portion

    for n=1:size(temp3,1)
```

```

% temp4 are edges, time_s acc_g frame (1:3 are up, and 4:6 are down)
% temp5, 3 before and 3 after, layer 1: time, layer 2: Acc in g

% identify beginning of clipped portion
upE=find(temp2(:,3)<temp3(n,3),1,'last');
if temp3(n,3)-1==temp2(upE,3)
    temp4(end+1,1:3)=temp3(n,:);
    temp5(size(temp4,1),1:winSize,1)=tempLowG.time_s(temp3(n,3)-
winSize:temp3(n,3)-1);
    temp5(size(temp4,1),1:winSize,2)=tempLowG.(['a' axis_n{axisn}
'_g']) (temp3(n,3)-winSize:temp3(n,3)-1);
end
% identify end of clipped portion
downE=find(temp2(:,3)>temp3(n,3),1);
if temp3(n,3)+1==temp2(downE,3)
    temp4(end,4:6)=temp3(n,:);

temp5(size(temp4,1),winSize+1:winSize*2,1)=tempLowG.time_s(temp3(n,3)+1:temp3
(n,3)+winSize);
    temp5(size(temp4,1),winSize+1:winSize*2,2)=tempLowG.(['a'
axis_n{axisn} '_g']) (temp3(n,3)+1:temp3(n,3)+winSize);
end
end

temp2=temp2(upE:end);
freq=1125; %lowg sampling frequency

for n=1:size(temp5,1)
    clear xx yy
    x=temp5(n,1:winSize*2,1); % time (raw)
    y=temp5(n,1:winSize*2,2); % acceleraion signal used for interpolation
    (raw)
    xx=[temp5(n,1,1)
temp5(n,winSize,1)+1/freq:1/freq:temp5(n,winSize+1,1)-1/freq
temp5(n,winSize*2,1)]; % time (after interpolation)
    S = spapi(5,x,y); % 5th order Spline
    S = fnval(xx,S)'; % acceleration signal after interpolation

    periodT=[];

    % combining the preserved (unaltered) part of signal with
    % interpolated signal
    if n==1 % from start
        periodT=find(tempLowG.time_s<temp5(n,1,1));
        recon=[tempLowG.time_s(periodT) tempLowG.(['a' axis_n{axisn}
'_g']) (periodT); xx' S];
        % if size(temp5,1)==1
        % periodTend=find(tempLowG.time_s>temp5(n,6,1));
        % recon=[recon; tempLowG.time_s(periodTend)
tempLowG.(['a' axis_n{axisn} '_g']) (periodTend)];
        % end
    elseif n==size(temp5,1) % to end
        periodT=find(tempLowG.time_s>temp5(n-1,winSize*2,1) &
tempLowG.time_s<temp5(n,1,1));
        periodTend=find(tempLowG.time_s>temp5(n,winSize*2,1));

```

```

        recon=[recon; tempLowG.time_s(periodT) tempLowG.(['a'
axis_n{axisn} '_g']) (periodT); xx' S; tempLowG.time_s(periodTend)
tempLowG.(['a' axis_n{axisn} '_g']) (periodTend)];
        else % in between
            periodT=find(tempLowG.time_s>temp5(n-1,winSize*2,1) &
tempLowG.time_s<temp5(n,1,1));
            recon=[recon; tempLowG.time_s(periodT) tempLowG.(['a'
axis_n{axisn} '_g']) (periodT); xx' S];
        end

    end

    if isempty(recon) % if no clipped portion identified
        recon=[tempLowG.time_s tempLowG.(['a' axis_n{axisn} '_g'])];
    end
    sample.lowG_recon.(['a' axis_n{axisn}])=recon;

    subplot(3,1,axisn)
    plot(sample.lowG_raw.time_s,sample.lowG_raw.(['a' axis_n{axisn}
'_g']),':')
    hold on
    plot(sample.lowG_recon.(['a' axis_n{axisn}]) (:,1),sample.lowG_recon.(['a'
axis_n{axisn}]) (:,2))
    plot(sample.highG_raw.time_s,sample.highG_raw.(['a' axis_n{axisn} '_g']))
    box off
    if axisn == 1
        legend('LowG-raw','LowG-restored','HighG')
    end
end
end

```

## Supplementary File S3

Histogram of axial peaks obtained from the Low-G-raw and Low-G-restored signal and the true value for all participants.

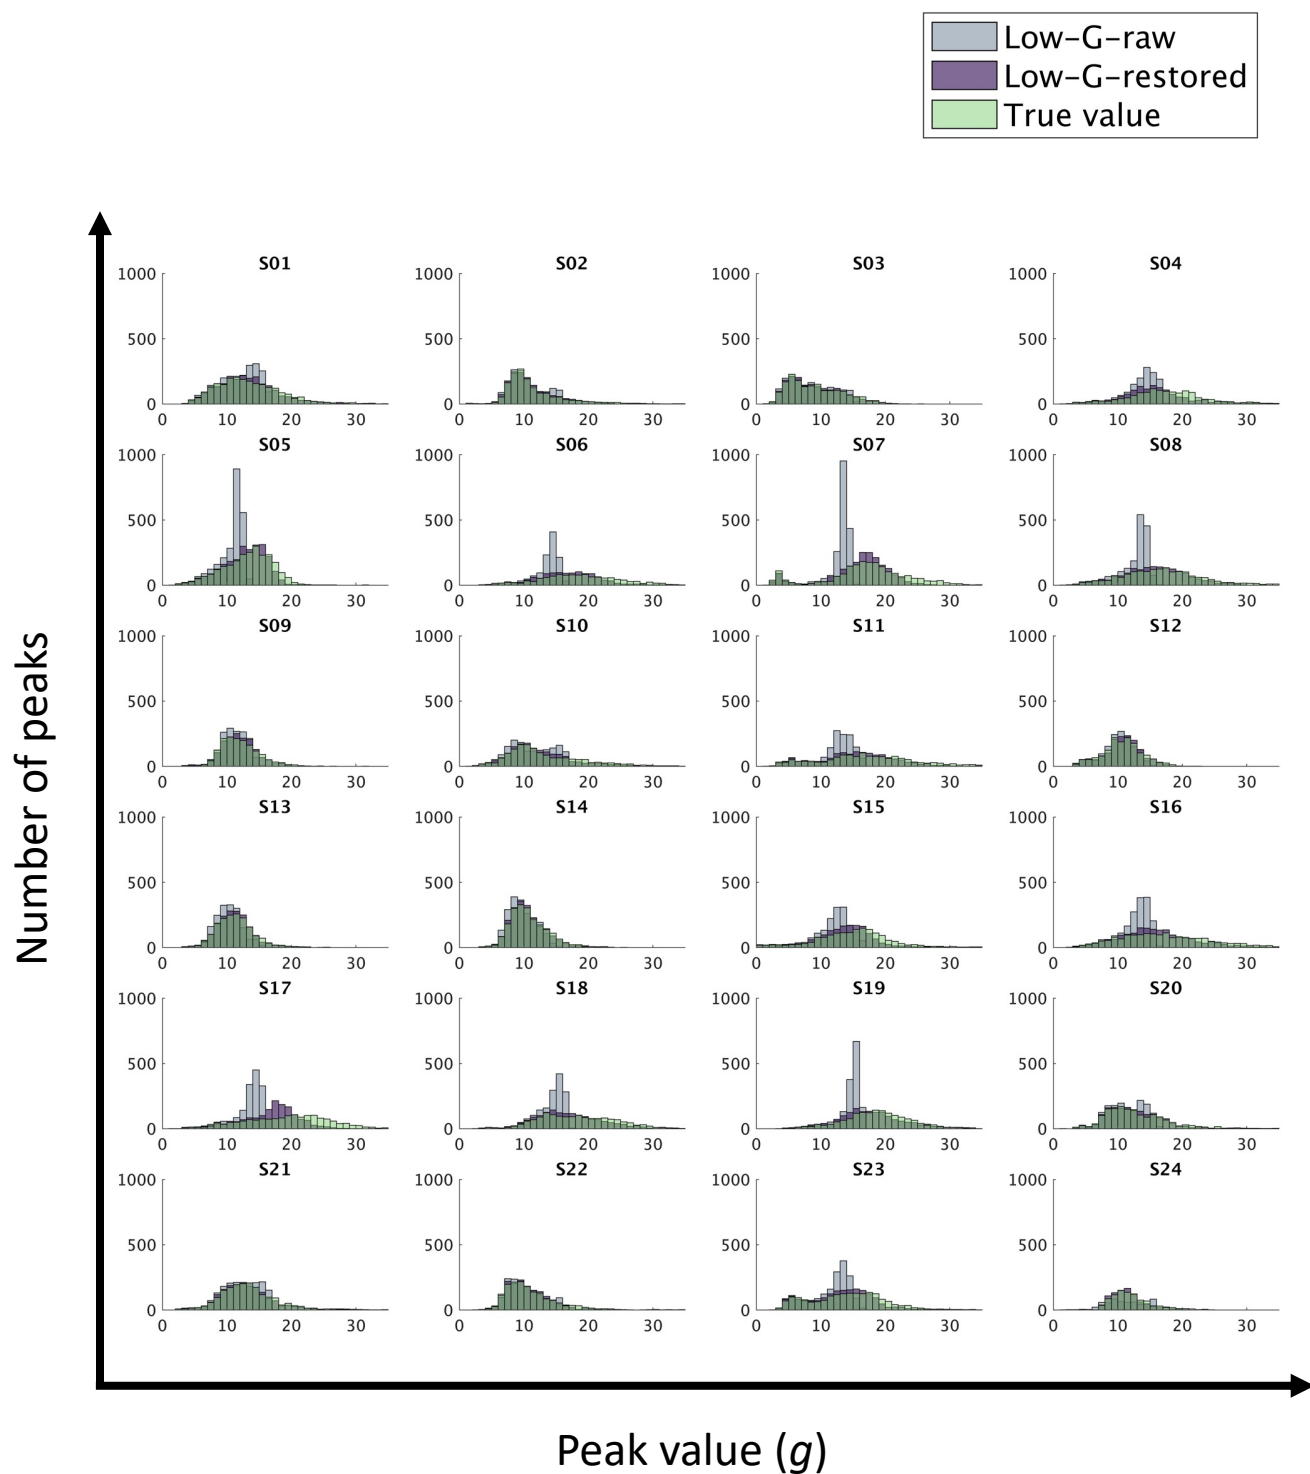

Supplement: s1 [file s1]
